# Supplementary material for: HIF-1α-Overexpressing Mesenchymal Stem Cells Attenuate Colitis by Regulating M1-like Macrophages Polarization toward M2-like Macrophages
Source: MDPI journal article supplement (doi:10.3390/biomedicines11030825), 2023-03-08
Supplement: s1 [file s1]

## Supplementary Materials

**Table S1 HIF1A Gene amplification Primer Sequence**

| ID       | Sequence (5'-3')                               |
|----------|------------------------------------------------|
| HIF1A-P1 | AGGTCGACTCTAGAGGATCCCGCCACCATGGAGGGCGCCGGCGGCG |
| HIF1A-P2 | TCCTTGTAGTCCATACCGTTAACTTGATCCAAAGCTCTGAG      |

**Table S2 Primer Sequence**

| Gene           | Primer  | Sequence (5'-3')                |
|----------------|---------|---------------------------------|
| GAPDH          | Forward | TCAAGAAGGTGGTGAAGCAGG           |
|                | Reverse | TCAAAGGTGGAGGAGTGGGT            |
| $\beta$ -ACTIN | Forward | GCACAGAGCCTCGCCTT               |
|                | Reverse | GTTGTCGACGACGAGCG               |
| HIF-1A         | Forward | GTGGCGAAGATGGTCAAGTC            |
|                | Reverse | GGAGTGCCCTTGTTGAGGTGTT          |
| TGF- $\beta$   | Forward | TACAGCAACAATTCCTGGCGATACC       |
|                | Reverse | AATTTCCCCTCCACGGCTCAAC          |
| IL-10          | Forward | TTCACAGGGAAGAAATCG              |
|                | Reverse | ACCAAGACCCAGACATCA              |
| IL-12b         | Forward | TCACAAAGGAGGCGAGGTTCTA          |
|                | Reverse | CTCTGCTGCTTTTGACACTGAATG        |
| IL-17A         | Forward | GGATGCCCAAATTCTGAGGAC           |
|                | Reverse | ACTTTGCCTCCCAGATCACA            |
| IL-23          | Forward | TGGCTGTGCCTAGGAGTAGCA           |
|                | Reverse | TTCATCCTCTTCTTCTCTTAGTAGATTCATA |
| IL-6           | Forward | AA TTTCTCTGGTCTTCTGG            |
|                | Reverse | ACTCTGGCTTTGTCTTTCTTGTT         |
| TNF-a          | Forward | GCCAGGAGGGAGAACAGAAACTC         |
|                | Reverse | GGCCAGTGAGTGAAAGGGACA           |
| LDHA           | Forward | CCAACATGGCAGCCTTTTCC            |
|                | Reverse | TCACGTTACGCTGGACCA AA           |
| CXCR-4         | Forward | CCTCTACAGCAGCGT TCT             |
|                | Reverse | GTT TCC TTG GCC TTT GAC         |
| VEGF           | Forward | ACATTGGTCACTTCCAGAAACAC         |
|                | Reverse | TGGTTGGAACCGGCATCTTA            |

|                |         |                           |
|----------------|---------|---------------------------|
| GAPDH          | Forward | CTCTGCTCCTCCTGTTTCGAC     |
|                | Reverse | GCGCCCAATACGACCAAATC      |
| AKT1           | Forward | GCACAAACGAGGGGAGTACATC    |
|                | Reverse | GCCATCATTCTTGAGGAGGAAGTAG |
| AKT2           | Forward | TGTTAGCACTTCACACCCATTG    |
|                | Reverse | CCCCAACCAAACGAGTCCTA      |
| C/CEBP $\beta$ | Forward | CCTGAGTAATCGCTTAAAGATGTTC |
|                | Reverse | GTGTTCTTAATGCTTGAAACGGA   |
| Arg-1          | Forward | TGCCCTTTGCTGACATCCCTAAT   |
|                | Reverse | TTCTTCCGTTCTTCTTGACTTCTGC |
| CCR-7          | Forward | CAGAGGAGCAGCAGTGAGCAAG    |
|                | Reverse | GGTGCGGATGATGACAAGGTAACAG |
| INOS           | Forward | CAAGCTGAACTTGAGCGAGGA     |
|                | Reverse | TTTACTCAGTGCCAGAAGCTGGA   |

Figure S1. The adipogenic and osteogenic differentiation of HIF-MSCs.

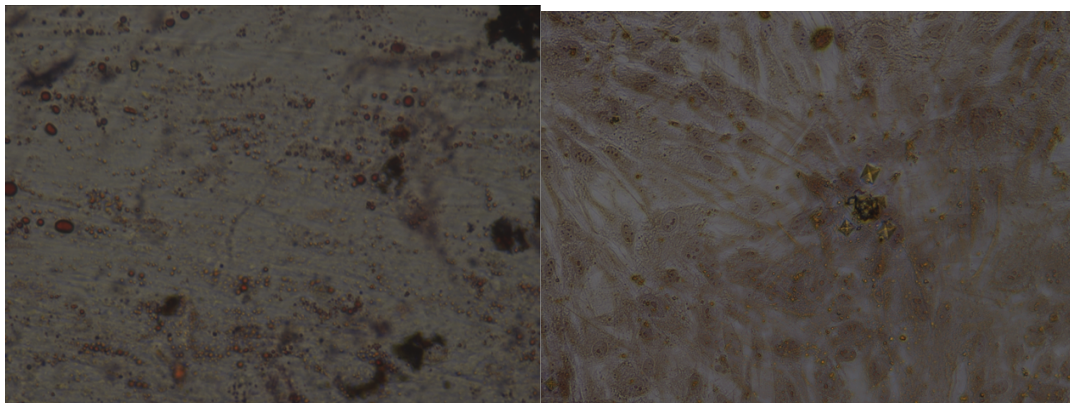

Figure S2. GFP-labeled MSCs and HIF-MSCs colonized in intestinal tissue 3 days after transplantation.

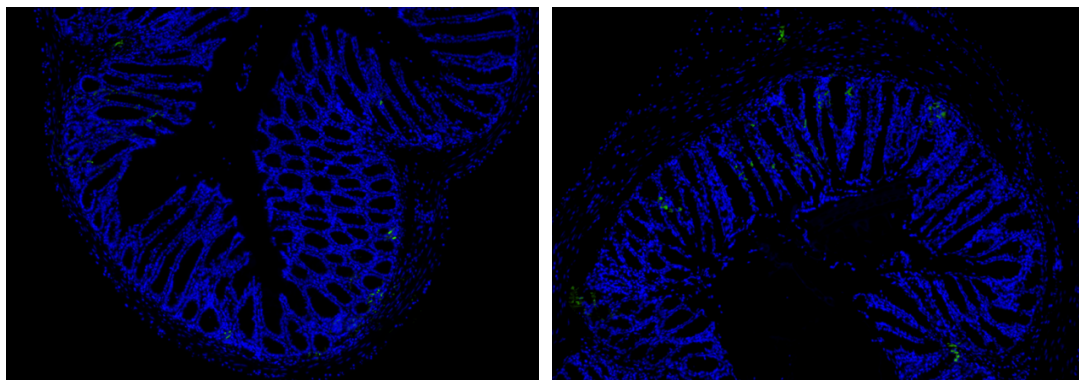

GFP-MSCs

GFP-HIFMSCs
